# Supplementary material for: Identifying regulators of associative learning using a protein-labelling approach in Caenorhabditis elegans
Source: eLife journal article supplement (doi:10.7554/elife.108438), 2025-11-05
Supplement: fig1-figsupp1-data1 [file Figure 1-figure supplement 1-source data 1.pdf › Figure 1-figure supplement 1-source data 1/Figure 1-figure supplement 1-source data 1.pdf]

*Colorimetric for SA-HRP blot*

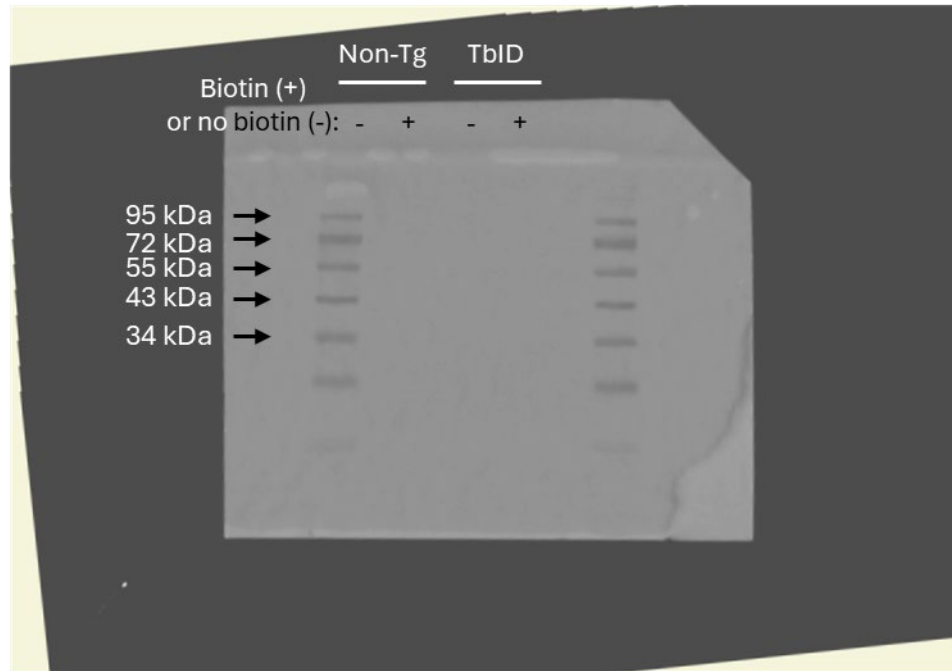

*Chemiluminescence  
for SA-HRP blot*

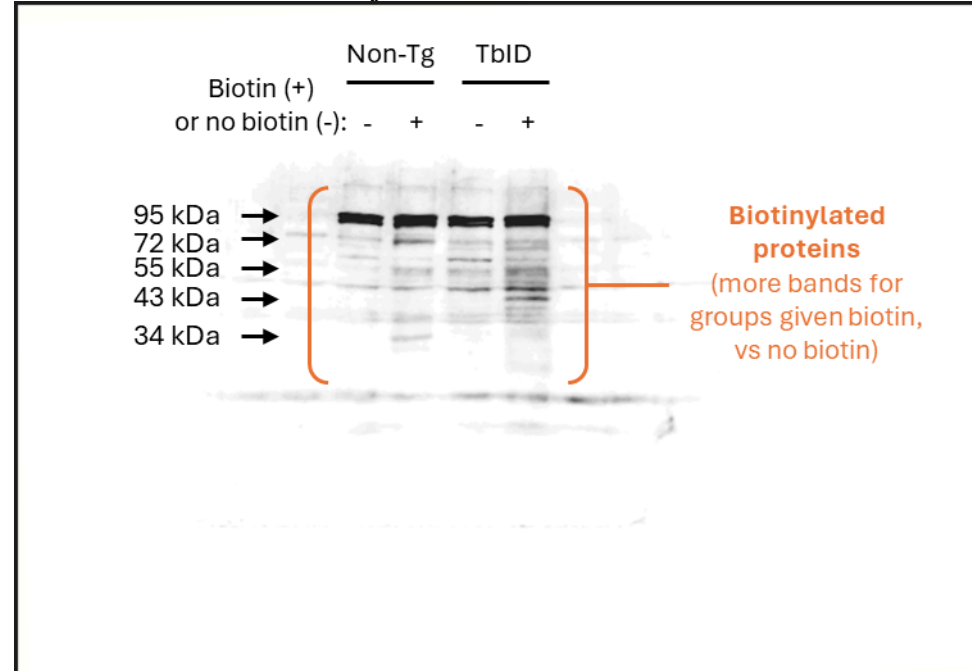

**Figure 1 – figure supplement 1, Source Data 1.** Original membrane images corresponding to **Figure 1 – figure supplement 1**. Lanes contain total protein from biotin-depleted non-transgenic/Non-Tg animals or TurboID/TbID worms either treated with ‘no biotin’ (-) or ‘biotin’ (+). *C. elegans* lines and treatment strategies are annotated on the top of each image. Biotinylated proteins were visualised using chemiluminescence via streptavidin-horseradish peroxidase (SA-HRP). Leftmost lane contains protein ladder (shown in the ‘colorimetric’ image). Molecular weights for protein ladder standards are annotated on the left side of each image (in kDa). Relevant bands are annotated in orange.
